# Supplementary material for: Bioinspired nonheme iron complex that triggers mitochondrial apoptotic signalling pathway specifically for colorectal cancer cells
Source: Royal Society of Chemistry journal article supplement (doi:10.1039/d1sc05094j), 2021-12-11
Supplement: d1sc05094j1.pdf [file d1sc05094j1.pdf]

## Electronic Supplementary Information

### **Bioinspired nonheme iron complex that triggers mitochondrial apoptotic signalling pathway specifically for colorectal cancer cells**

Yool Lee,<sup>#a</sup> Chaeun Oh,<sup>#b</sup> Jin Kim,<sup>c</sup> Myong-Suk Park,<sup>d</sup> Woo Kyun Bae,<sup>\*de</sup> Kyung Hyun Yoo<sup>\*b</sup> and Seungwoo Hong<sup>\*a</sup>

<sup>a</sup> Department of Chemistry, Sookmyung Women's University, Seoul 04310, Korea.

<sup>b</sup> Department of Biological Sciences, Sookmyung Women's University, Seoul 04310, Korea.

<sup>c</sup> Department of Chemistry, Sunchon National University, Suncheon 57922, Korea.

<sup>d</sup> Division of Hemato-Oncology, Department of Internal Medicine, Chonnam National University Medical School and Hwasun Hospital, Hwasun, Republic of Korea.

<sup>e</sup> Combinatorial Tumor Immunotherapy MRC Center, Chonnam National University Medical School, Hwasun, Republic of Korea.

*# These authors contributed equally to this work.*

*\* To whom correspondence should be addressed.*

E-mail: drwookyun@jnu.ac.kr; khryu@sookmyung.ac.kr, hsw@sookmyung.ac.kr

---

## Table of Contents

---

|          |     |
|----------|-----|
| Fig. S1  | S3  |
| Fig. S2  | S4  |
| Fig. S3  | S5  |
| Fig. S4  | S6  |
| Fig. S5  | S7  |
| Fig. S6  | S8  |
| Fig. S7  | S9  |
| Fig. S8  | S10 |
| Fig. S9  | S11 |
| Fig. S10 | S12 |
| Fig. S11 | S13 |
| Fig. S12 | S14 |
| Fig. S13 | S15 |
| Fig. S14 | S16 |
| <hr/>    |     |
| Table S1 | S17 |
| Table S2 | S18 |
| Table S3 | S19 |

---

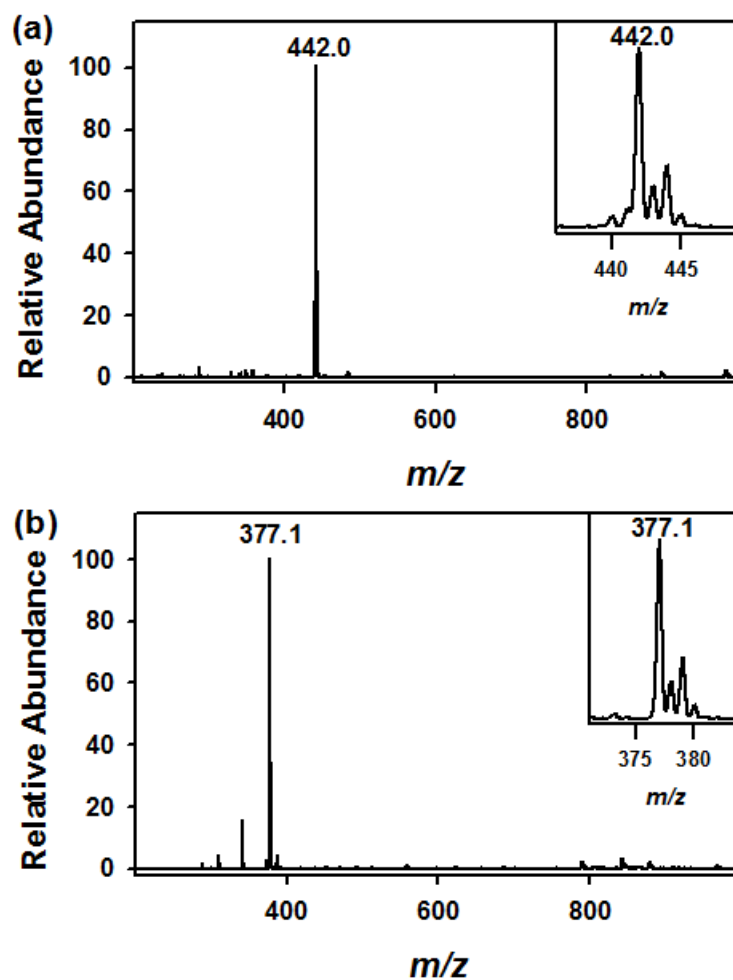

**Fig. S1.** ESI MS spectra of (a) **1**, and (b)  $[\text{Mn}(\text{HN3O2})(\text{Cl})_2]$  recorded in  $\text{CH}_3\text{CN}$ . The prominent ion peak at  $m/z$  of (a) 442.0, and (b) 377.1 correspond to  $[\text{Fe}(\text{HN3O2})(\text{ClO}_4)]^+$  (calculated  $m/z$  of 442.1) and  $[\text{Mn}(\text{HN3O2})(\text{Cl})]^+$  (calculated  $m/z$  of 377.1), respectively. Insets show the observed isotopic distribution patterns of **1**, and  $[\text{Mn}(\text{HN3O2})(\text{Cl})_2]$ .

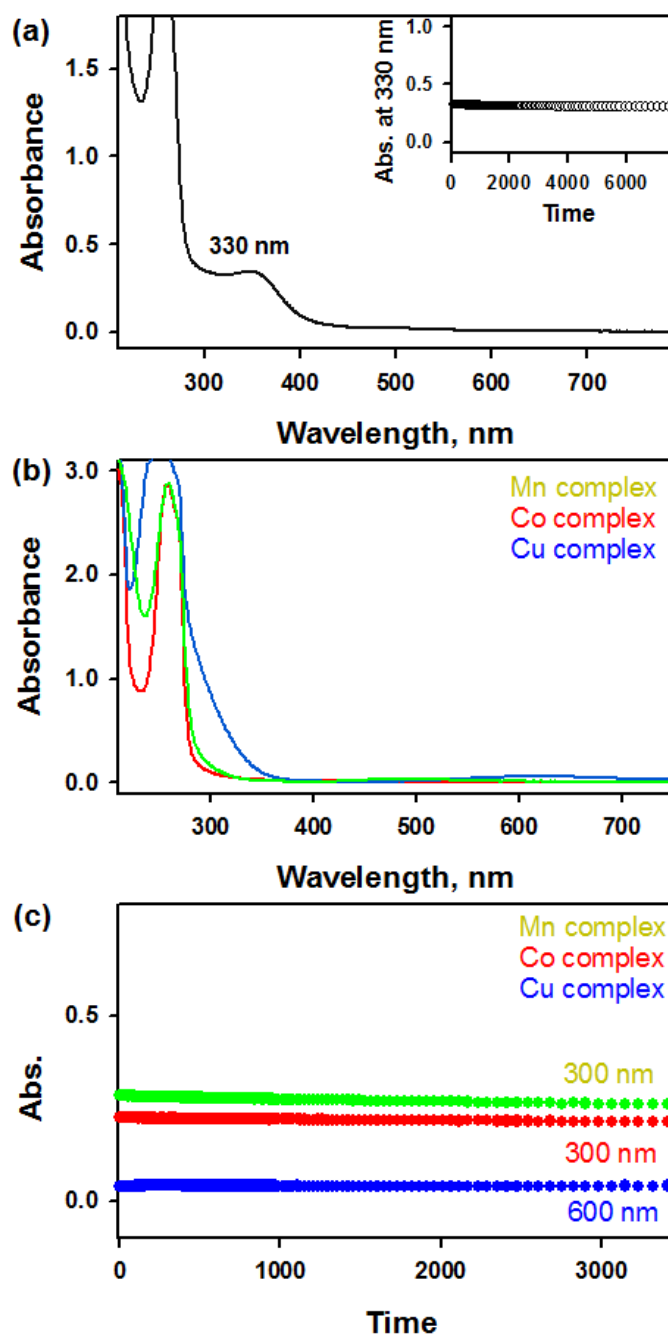

**Fig. S2.** (a) UV-vis spectrum of **1** (0.25 mM) in CH<sub>3</sub>CN at 20 °C. Inset shows the time course monitored at 330 nm for the stability of **1**. (b) UV-vis spectra of [Mn(HN3O2)(Cl)<sub>2</sub>] (0.25 mM, green line), [Co(HN3O2)]<sup>2+</sup> (0.25 mM, red line) and [Cu(HN3O2)]<sup>2+</sup> (0.25 mM, blue line) in CH<sub>3</sub>CN at 20 °C. (c) Time courses monitored at 300 nm for [Mn(HN3O2)(Cl)<sub>2</sub>] (green circle), [Co(HN3O2)]<sup>2+</sup> (red circle) and 600 nm for [Cu(HN3O2)]<sup>2+</sup> (blue circle).

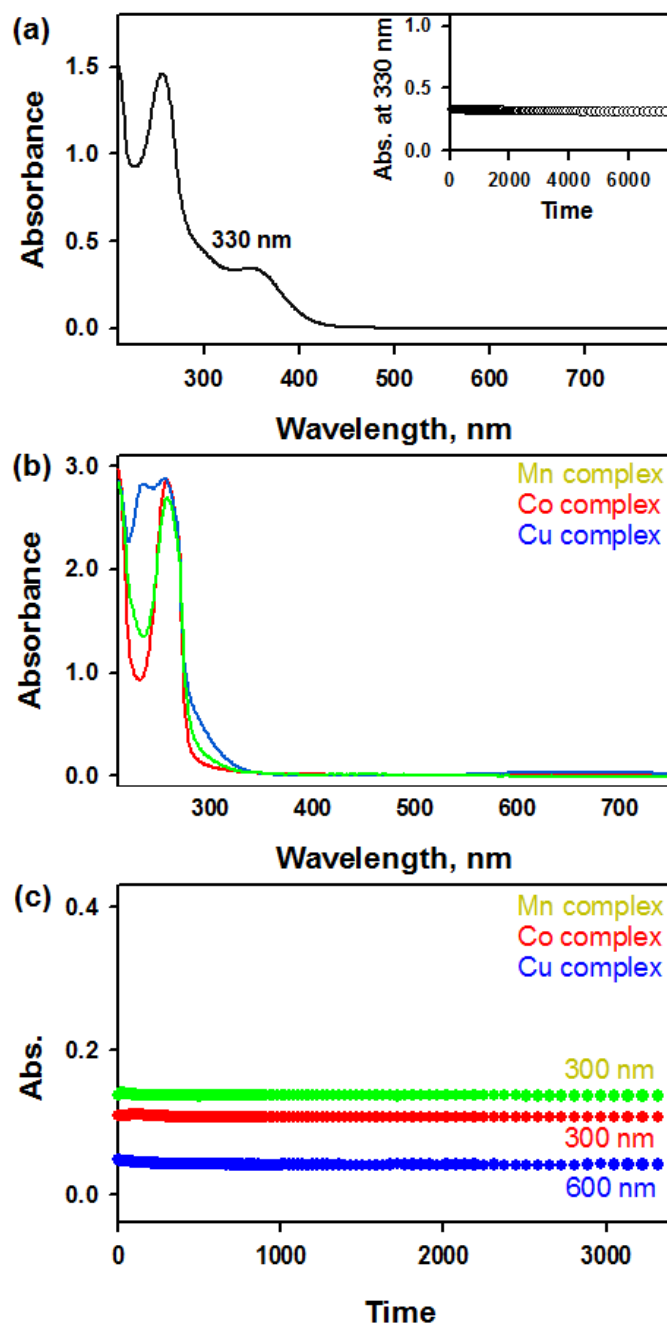

**Fig. S3.** (a) UV-vis spectrum of **1** (0.25 mM) in H<sub>2</sub>O at 20 °C. Inset shows the time course monitored at 330 nm for the stability of **1**. (b) UV-vis spectra of [Mn(HN3O2)(Cl)<sub>2</sub>] (0.25 mM, green line), [Co(HN3O2)]<sup>2+</sup> (0.25 mM, red line) and [Cu(HN3O2)]<sup>2+</sup> (0.25 mM, blue line) in H<sub>2</sub>O at 20 °C. (c) Time courses monitored at 300 nm for [Mn(HN3O2)(Cl)<sub>2</sub>] (green circle), [Co(HN3O2)]<sup>2+</sup> (red circle) and 600 nm for [Cu(HN3O2)]<sup>2+</sup> (blue circle).

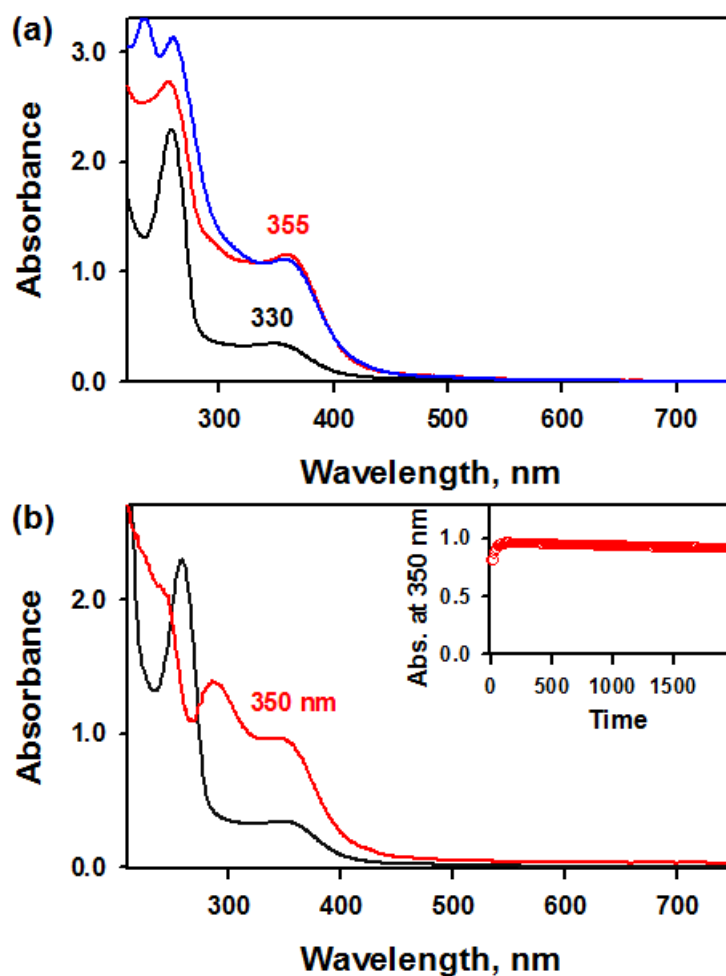

**Fig. S4.** (a) UV-vis spectra of **2** (0.20 mM) obtained in the reaction of **1** (0.20 mM) with PhIO (0.40 mM, blue line) and H<sub>2</sub>O<sub>2</sub> (0.60 mM, red line) in CH<sub>3</sub>CN at 20 °C. (b) UV-vis spectrum of **2** obtained in the reaction of **1** (0.20 mM) with H<sub>2</sub>O<sub>2</sub> (0.60 mM, red line) in CH<sub>3</sub>CN:H<sub>2</sub>O (v/v 1:1) at 5 °C.

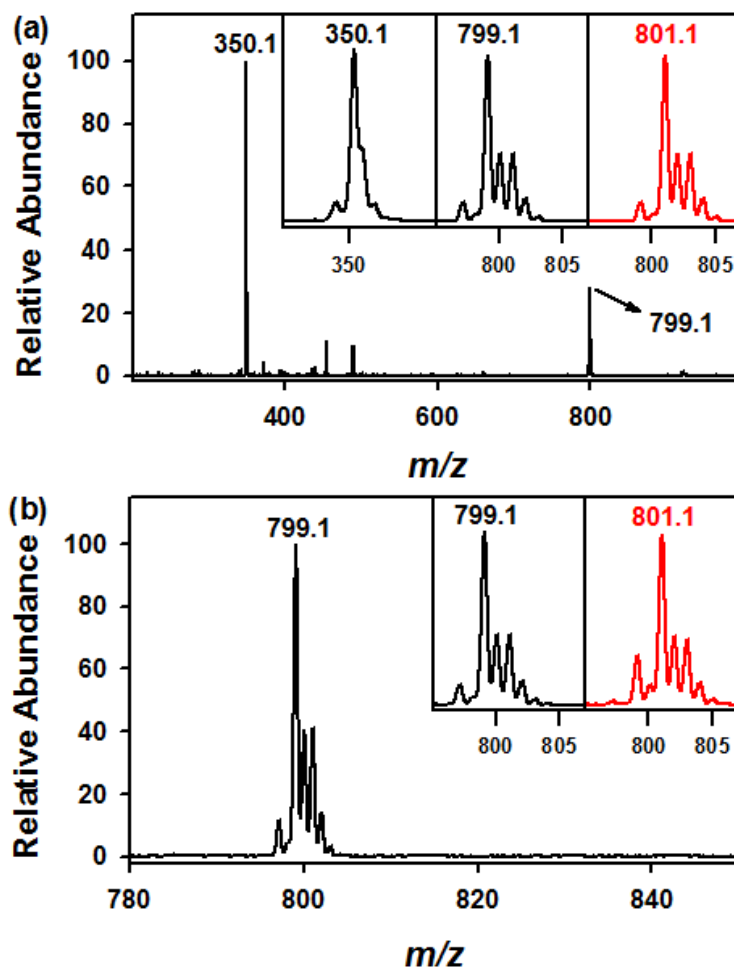

**Fig. S5.** ESI MS spectra of **2** obtained (a) in the reaction between **1** (0.20 mM) and  $\text{PhI}^{16/18}\text{O}$  (0.40 mM) in  $\text{CH}_3\text{CN}$  at 20 °C and (b) in the dioxygen activation reaction of **1** in the presence of BNAH, and  $\text{HClO}_4$  in  $^{16}\text{O}_2$  and  $^{18}\text{O}_2$ -saturated  $\text{CH}_3\text{CN}$  at 20 °C. The prominent ion peak at  $m/z$  of 350.1, and 799.1 correspond to  $[\text{Fe}_2(\text{O})(\text{N}_3\text{O}_2)_2]^{2+}$  (calculated  $m/z$  of 350.1) and  $[\text{Fe}_2(\text{O})(\text{N}_3\text{O}_2)_2(\text{ClO}_4)]^+$  (calculated  $m/z$  of 799.1), respectively. Insets show the observed isotopic distribution patterns of  $[\text{Fe}_2(\text{O})(\text{N}_3\text{O}_2)_2]^{2+}$ ,  $[\text{Fe}_2(^{16}\text{O})(\text{N}_3\text{O}_2)_2(\text{ClO}_4)]^+$  and  $[\text{Fe}_2(^{18}\text{O})(\text{N}_3\text{O}_2)_2(\text{ClO}_4)]^+$ .

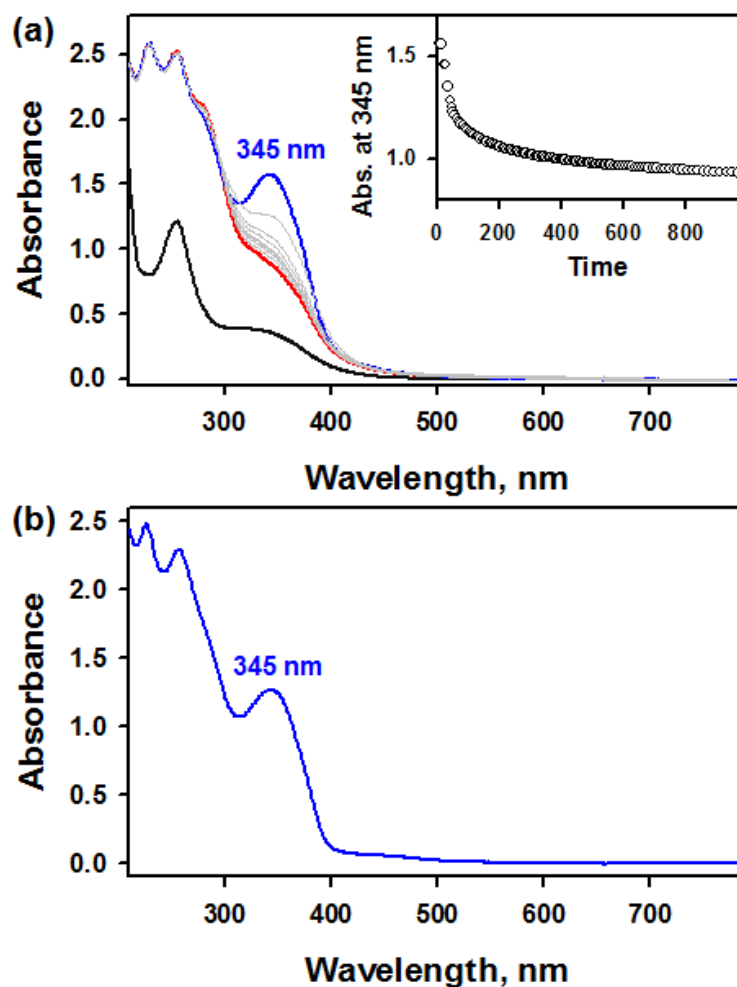

**Fig. S6.** (a) UV-Vis spectral changes observed in the reaction of **1** (black line, 0.10 mM) and BNAH (blue line, 0.20 mM) in the presence of HClO<sub>4</sub> (0.10 mM) in air-saturated CH<sub>3</sub>CN at 20 °C. The use of hydrochloric acid instead of HClO<sub>4</sub> showed the identical spectrum (data not shown). Inset shows the time courses monitored at 345 nm due to the decay of BNAH. (b) UV-vis spectrum of BNAH (0.20 mM) in air-saturated CH<sub>3</sub>CN at 20 °C.



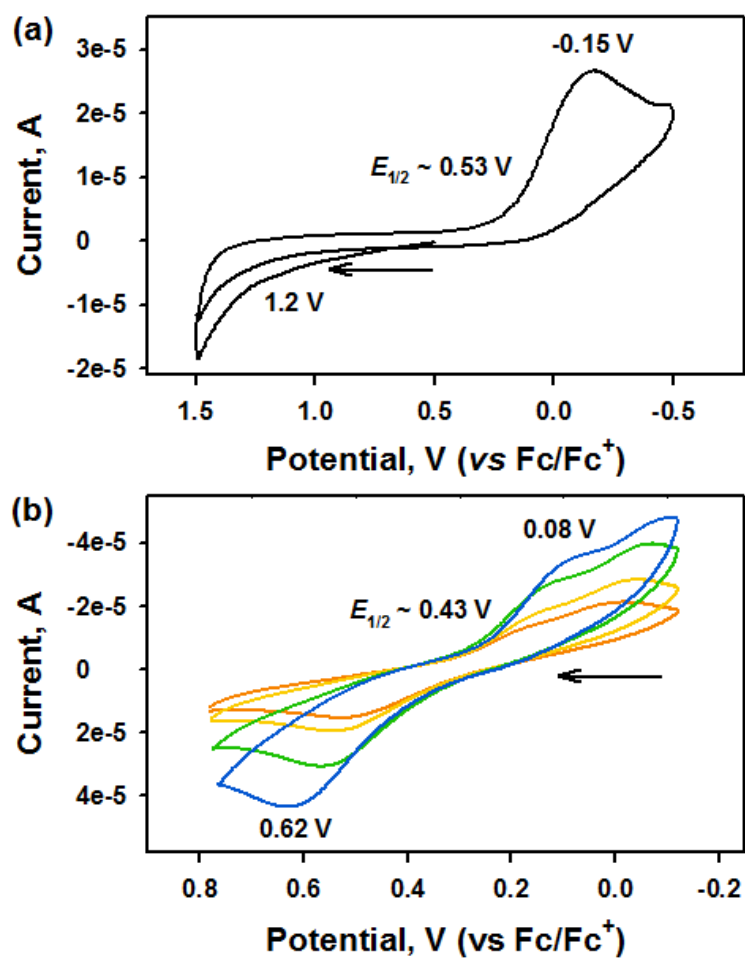

**Fig. S7.** Cyclic voltammogram of (a) **1** (2.0 mM) in CH<sub>3</sub>CN containing TBAPF<sub>6</sub> (0.10 M) with a glassy carbon working electrode at 20 °C with a scan rate of 0.10 V s<sup>-1</sup> and (b) **1** (4.0 mM) in H<sub>2</sub>O containing NaClO<sub>4</sub> (0.10 M) with a glassy carbon working electrode at 20 °C with scan rates of 0.10 (orange line), 0.20 (yellow line), 0.50 (red line), and 1.0 (blue line) V s<sup>-1</sup>.

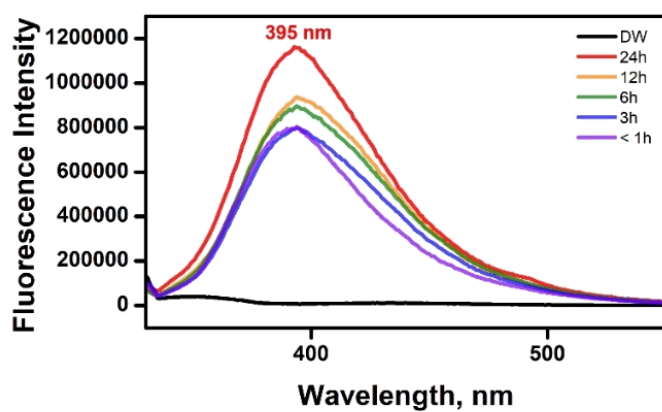

**Fig. S8.** Fluorescence intensity changes obtained in the reaction between **1** and TA in DW at room temperature.

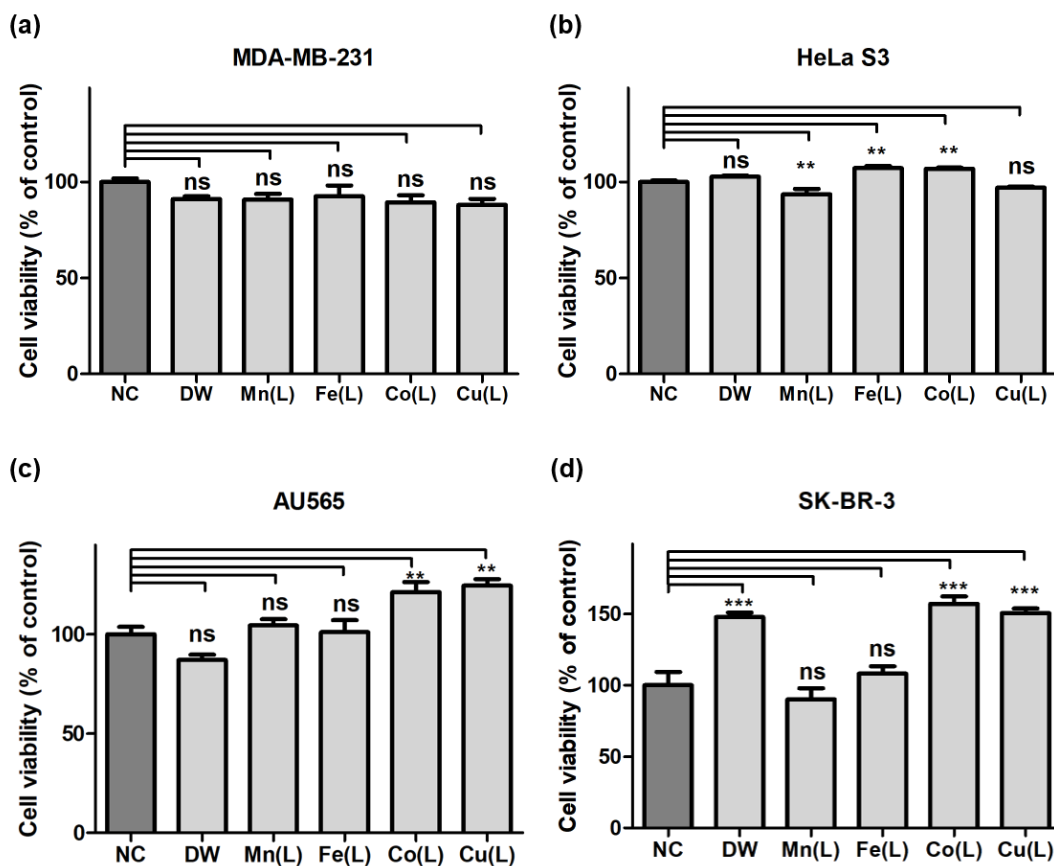

**Fig. S9.** Effects of treatment of negative control (NC), deionized water (DW), and  $[M(HN_3O_2)]^{2+}$  (M(L); M = Mn, Fe, Co, and Cu) on (a) MDA-MB-231 (b) HeLa S3 (c) AU565 (d) SK-BR-3 cells by WST-8 assay with respect to total cell viability after 24h. The viability of cells without additional complexes is defined as 100%. The statistical analysis was performed using one way ANOVA-Dunnett's test (\*  $p < 0.05$ , \*\*  $p < 0.01$ , \*\*\*  $p < 0.001$  and ns = nonsignificant as compared to control).

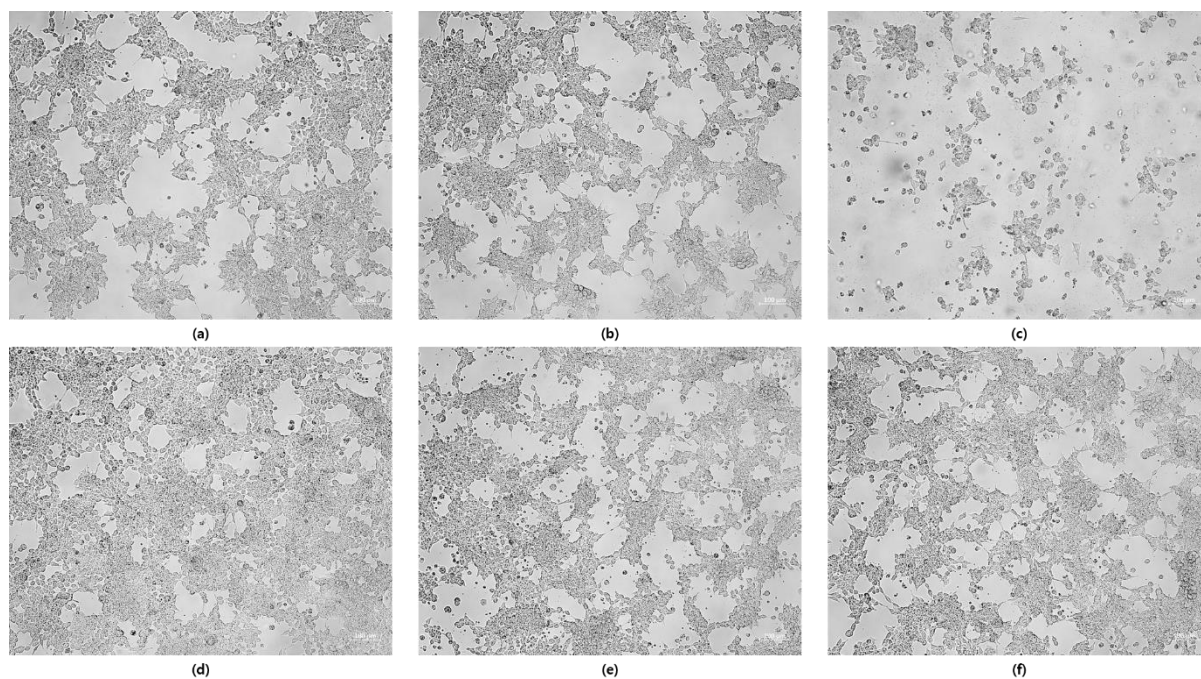

**Fig. S10.** Representative images of HCT116 cells (a) negative control, (b) deionized water, and after incubation with (c) **1**, (d)  $[\text{Mn}(\text{HN3O2})]^{2+}$ , (e)  $[\text{Co}(\text{HN3O2})]^{2+}$ , and (f)  $[\text{Cu}(\text{HN3O2})]^{2+}$  for 24 h. Scale bar: 100  $\mu\text{m}$ .

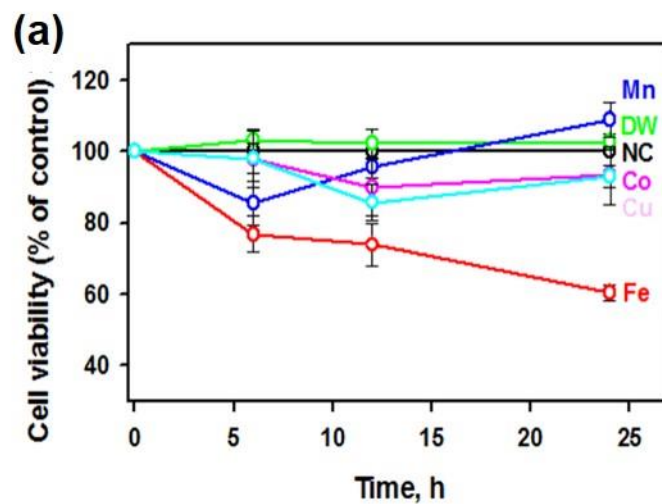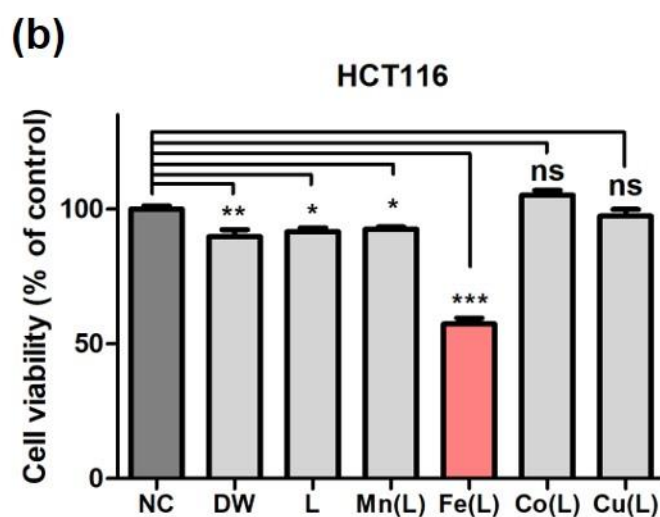

**Fig. S11.** Effects of treatment of deionized water (DW, green),  $[M(HN_3O_2)]^{2+}$  (M(L); M = Mn (blue), Fe (red), Co (pink), Cu (cyan)), and ligand on HCT116 cells by WST-8 assay (a) with respect to time and (b) total cell viability after 24 h. The viability of HCT116 cells without additional complexes is defined as 100%. The statistical analysis was performed using one way ANOVA-Dunnett's test (\*\*\*) =  $p < 0.0001$ ; ns = nonsignificant as compared to control).

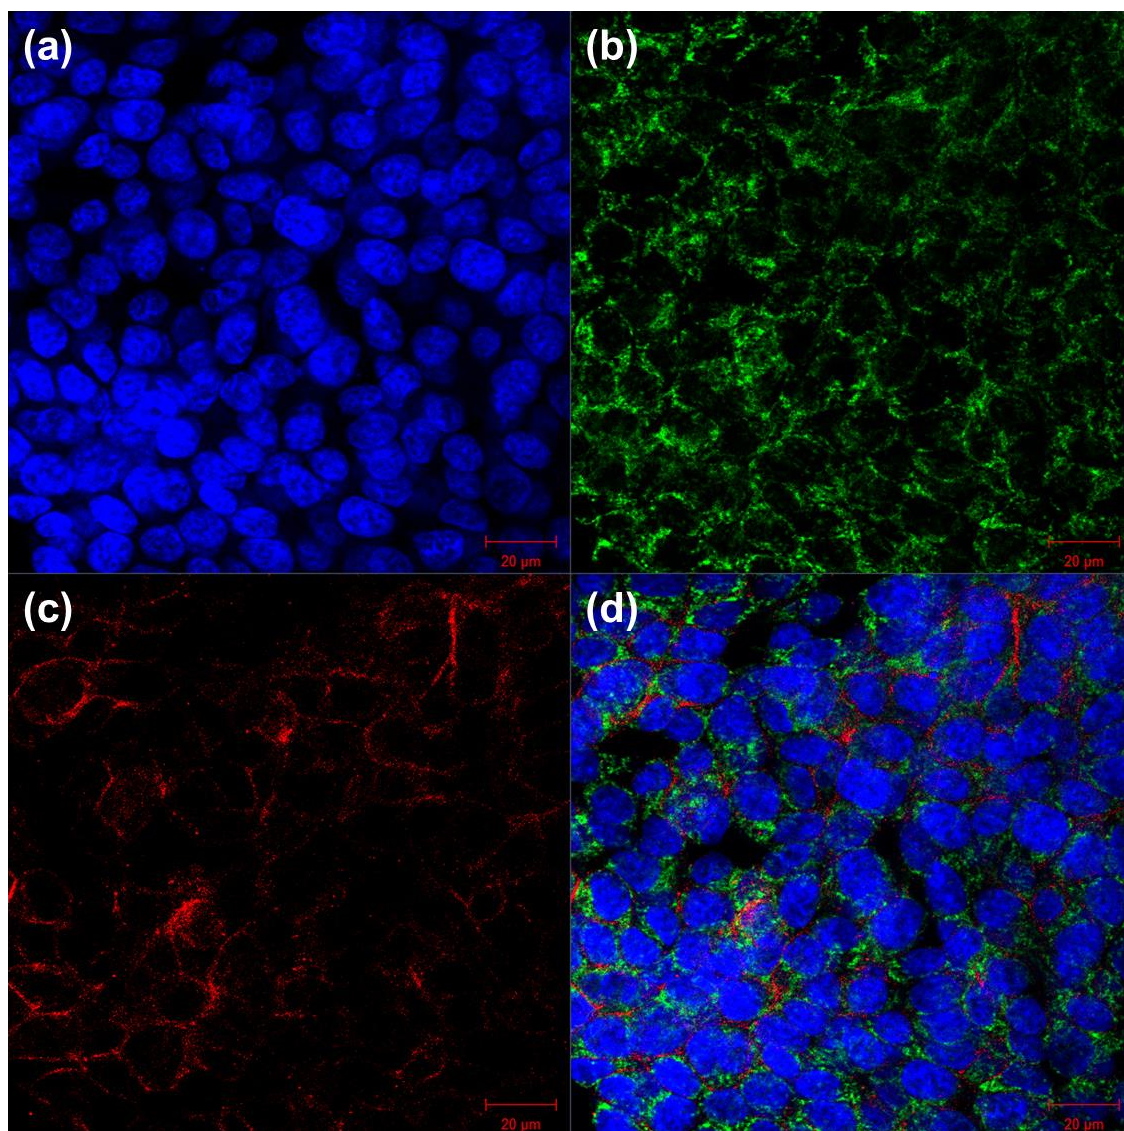

**Fig. S12.** Controlled confocal fluorescence images of HCT116 cells after 24 h incubation with DW followed by staining with (a) DAPI (blue), (b) antibody-COX IV (green), (c) antibody-E-cadherin (red), and (d) merged image. Scale bar: 20  $\mu\text{m}$ .



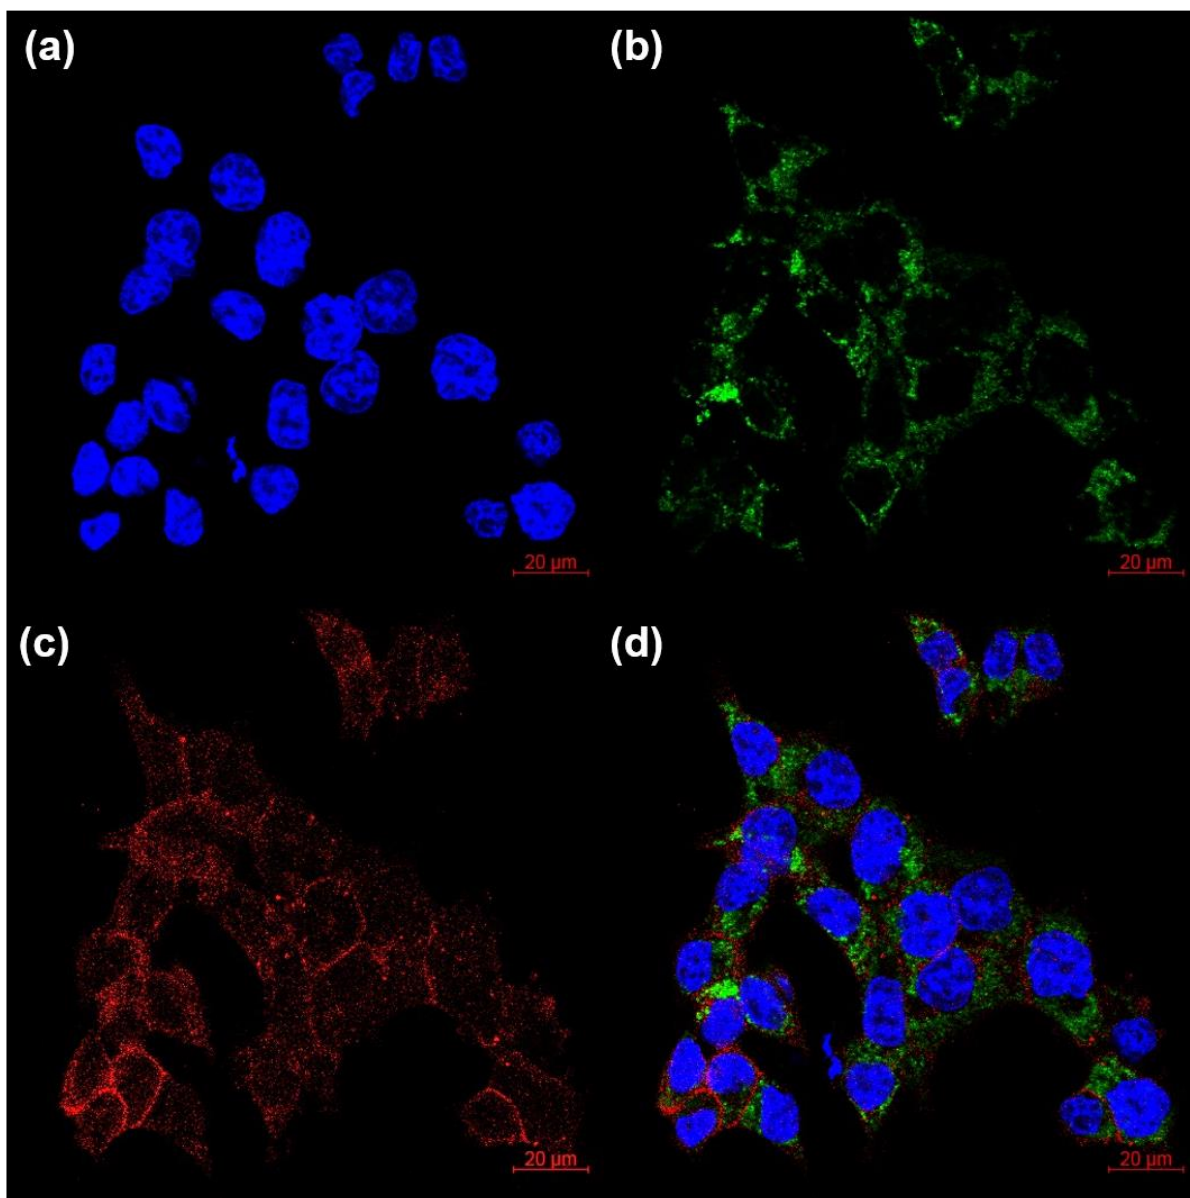

**Fig. S13.** Confocal fluorescence images of HCT116 cells after 24 h incubation with **1** followed by staining with (a) DAPI (blue), (b) antibody-COX IV (green), (c) antibody-E-cadherin (red), and (d) merged image. Scale bar: 20  $\mu\text{m}$ .

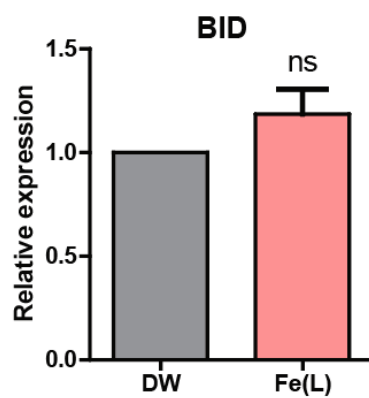

**Fig. S14.** The expression level of BID in HCT116 cells treated with **1**.



**Table S1.** Crystallographic data and refinements for [Mn(HN3O2)(Cl)<sub>2</sub>], **1**, and **2**.

|                                                                 | [Mn(HN3O2)(Cl) <sub>2</sub> ]                                                   | <b>1</b>                                                                         | <b>2</b>                                                                                       |
|-----------------------------------------------------------------|---------------------------------------------------------------------------------|----------------------------------------------------------------------------------|------------------------------------------------------------------------------------------------|
| Empirical formula                                               | C <sub>16</sub> H <sub>21</sub> Cl <sub>2</sub> MnN <sub>3</sub> O <sub>2</sub> | C <sub>16</sub> H <sub>25</sub> Cl <sub>2</sub> FeN <sub>3</sub> O <sub>12</sub> | C <sub>32</sub> H <sub>46</sub> Cl <sub>4</sub> Fe <sub>2</sub> N <sub>6</sub> O <sub>23</sub> |
| Formula weight                                                  | 413.20                                                                          | 578.41                                                                           | 1136.25                                                                                        |
| Temperature (K)                                                 | 120                                                                             | 120                                                                              | 120                                                                                            |
| Wavelength (Å)                                                  | 0.71073                                                                         | 0.71073                                                                          | 0.71073                                                                                        |
| Crystal system/space group                                      | orthorhombic, <i>P</i> <sub>na21</sub>                                          | monoclinic, <i>P</i> <sub>21</sub>                                               | monoclinic, <i>P</i> <sub>c2/c</sub>                                                           |
| Unit cell dimensions                                            |                                                                                 |                                                                                  |                                                                                                |
| <i>a</i> (Å)                                                    | 14.289(4)                                                                       | 14.194(4)                                                                        | 15.9079(12)                                                                                    |
| <i>b</i> (Å)                                                    | 8.933(2)                                                                        | 10.712(3)                                                                        | 17.3412(13)                                                                                    |
| <i>c</i> (Å)                                                    | 28.022(7)                                                                       | 15.769(4)                                                                        | 16.1343(12)                                                                                    |
| <i>α</i> (°)                                                    | 90                                                                              | 90                                                                               | 90                                                                                             |
| <i>bβ</i> (°)                                                   | 90                                                                              | 102.510(4)                                                                       | 90.724(1)                                                                                      |
| <i>γ</i> (°)                                                    | 90                                                                              | 90                                                                               | 90                                                                                             |
| Volume (Å <sup>3</sup> )                                        | 3576.8(16)                                                                      | 2340.8(11)                                                                       | 4450.5(6)                                                                                      |
| Z                                                               | 8                                                                               | 4                                                                                | 4                                                                                              |
| Calculated density (g/cm <sup>-3</sup> )                        | 1.535                                                                           | 1.641                                                                            | 1.696                                                                                          |
| Absorption coefficient (mm <sup>-1</sup> )                      | 1.051                                                                           | 0.939                                                                            | 0.985                                                                                          |
| Reflections collected                                           | 6188                                                                            | 7959                                                                             | 3913                                                                                           |
| Absorption correction                                           | multi-scan<br>(T <sub>min</sub> = 0.591,<br>T <sub>max</sub> = 0.745)           | multi-scan<br>(T <sub>min</sub> = 0.601,<br>T <sub>max</sub> = 0.745)            | multi-scan<br>(T <sub>min</sub> = 0.689,<br>T <sub>max</sub> = 0.745)                          |
| Independent reflections                                         | 5717                                                                            | 6552                                                                             | 3589                                                                                           |
| Goodness-of-fit on <i>F</i> <sup>2</sup>                        | 1.097                                                                           | 1.017                                                                            | 1.082                                                                                          |
| <i>R</i> [ <i>F</i> <sup>2</sup> > 2σ( <i>F</i> <sup>2</sup> )] | 0.0404                                                                          | 0.0359                                                                           | 0.0298                                                                                         |
| <i>wR</i> <sup>2</sup>                                          | 0.1052                                                                          | 0.0864                                                                           | 0.0817                                                                                         |

**Table S2.** Selected bond distances (Å) and angles (°) for [Mn(HN3O2)(Cl)<sub>2</sub>], **1**, and **2**.

|                                    | [Mn(HN3O2)(Cl) <sub>2</sub> ] | <b>1</b>   | <b>2</b>    |
|------------------------------------|-------------------------------|------------|-------------|
| Bond Distances (Å)                 |                               |            |             |
| M1-N1                              | 2.255(4)                      | 2.118(4)   | 2.2167(18)  |
| M1-N2                              | 2.341(4)                      | 2.252(4)   | 2.1813(17)  |
| M1-N3                              | 2.248(4)                      | 2.122(3)   | 2.1431 (17) |
| M1-O1                              | 2.358(4)                      | 2.158(3)   | 2.1813(17)  |
| M1-O2                              | -                             | 2.068(3)   | 2.0016(15)  |
| M1-O3 <sub>(H2O or bridging)</sub> | -                             | 2.148(3)   | 1.7799(4)   |
| M1-M2                              | 2.4054(13)                    | -          | 3.530(1)    |
| M1-Cl1                             | 2.4054(13)                    | -          | -           |
| M1-Cl2                             | 2.4580(14)                    | -          | -           |
| Bond Angles (°)                    |                               |            |             |
| N1-M1-N2                           | 72.73(13)                     | 77.59(14)  | 77.39(6)    |
| N1-M1-N3                           | 146.48(14)                    | 150.88(14) | 154.99(7)   |
| N1- M1-O1                          | 82.61(13)                     | 95.35(14)  | 88.05(6)    |
| N2-M1-O2                           | -                             | 155.06(14) | 153.37(6)   |
| N1-M1-O3                           | -                             | 85.04(14)  | 96.94(6)    |
| O1-M1-O3                           | -                             | 166.26(12) | 174.52(6)   |
| M1-O3-M2                           | -                             | -          | 165.08(6)   |
| N2-M1-Cl1                          | 163.21(11)                    | -          | -           |
| O1-M1-Cl2                          | 165.23(9)                     | -          | -           |
| N1-M1-Cl1                          | 108.05(11)                    | -          | -           |
| N1-M1-Cl2                          | 92.31(11)                     | -          | -           |

**Table S3.** Sequences of qRT-PCR primers.

| <b>Gene</b> |         | <b>Sequences (5' → 3')</b> |
|-------------|---------|----------------------------|
| hBCL2 alpha | Forward | ATGTGTGTGGAGAGCGTCAA       |
|             | Reverse | CCGTACAGTTCCACAAAGGC       |
| hBCL2 beta  | Forward | ATGTGTGTGGAGAGCGTCAA       |
|             | Reverse | GCCCAGACTCACATCACCAA       |
| hBAX        | Forward | TGGGCTGGACATTGGACTTC       |
|             | Reverse | AAAGTAGGAGAGGAGGCCGT       |
| hBAK        | Forward | AAAGTAGGAGAGGAGGCCGT       |
|             | Reverse | ATGGGACCATTGCCCAAGTT       |
| hBID        | Forward | AGCACAGTGCGGATTCTGT        |
|             | Reverse | CTCATCCCTGAGGCTGGAAC       |
| h18s rRNA   | Forward | GTCGGCGTCCCCCAACTTCT       |
|             | Reverse | CGTGCAGCCCCGGACATCTA       |
